# Supplementary material
Source: Springer Nature journal article supplement (https://www.springermedizin.de/resource/supplementary/12889_2009_1920_MOESM1_ESM.pdf/9487258)

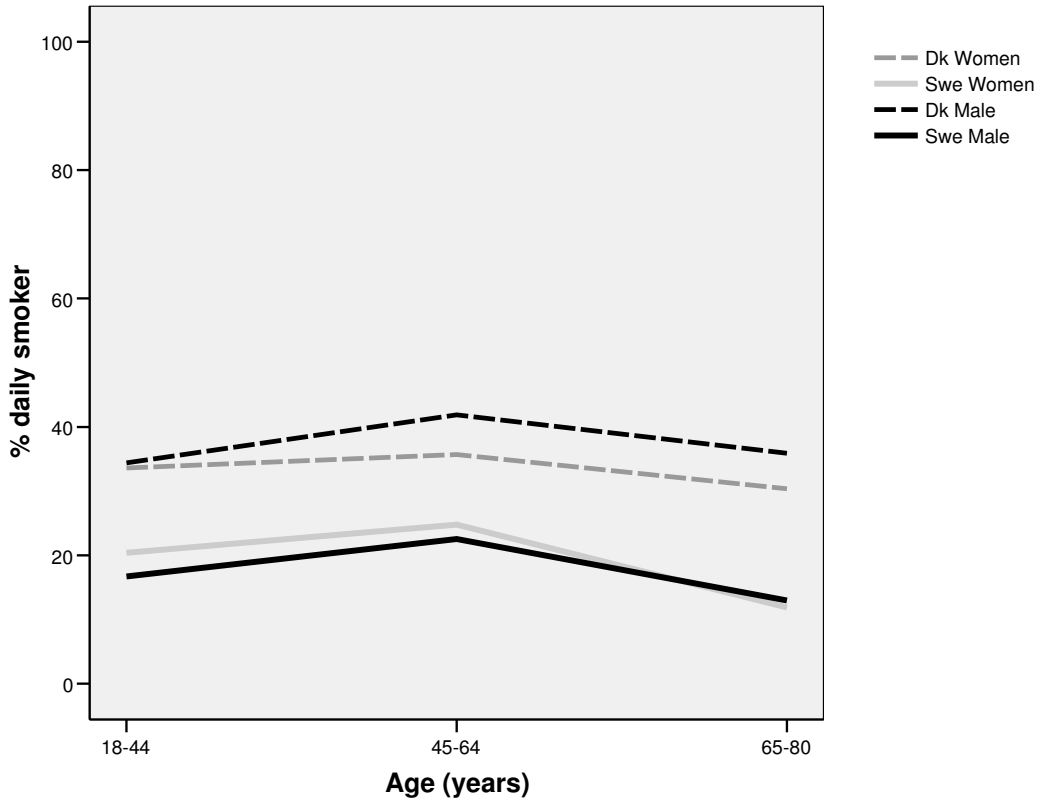

Supplement: MOESM1 [file 9487258]
